# Supplementary material for: Chikungunya disease in nonhuman primates involves long-term viral persistence in macrophages
Source: JCI journal article supplement (doi:10.1172/jci40104), 2010-02-23
Supplement: sd1 [file 1]

Figure S1.

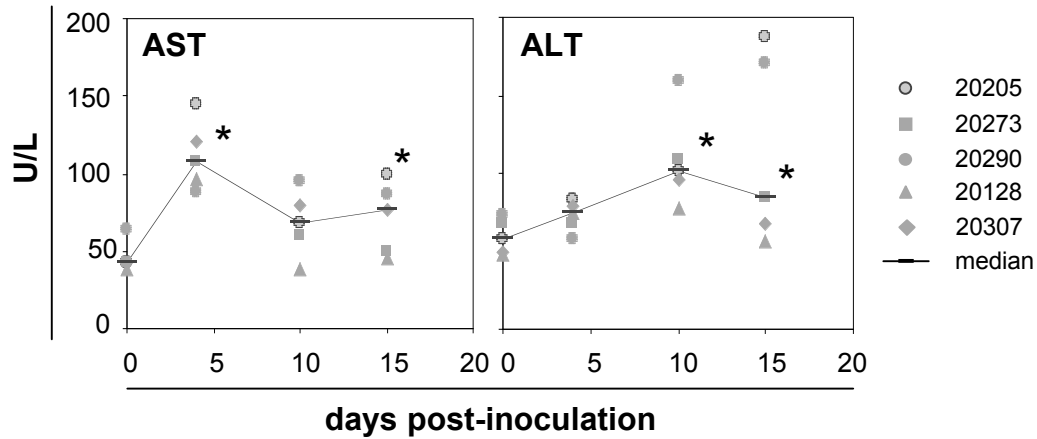

**Figure S1. Biochemical measurements in CHIKV-infected macaques.**

Aspartate transaminase (AST) and alanine transaminase (ALT) levels were evaluated in monkeys inoculated with  $10^3$  PFU of CHIKV, using Gamme DPC Kit AST/GOT or ALT/GPT (Thermo Electron Corporation), following the manufacturer's instructions.

\*= significantly higher than baseline ( $p < 0.05$ ; Wilcoxon rank test)

Figure S2.

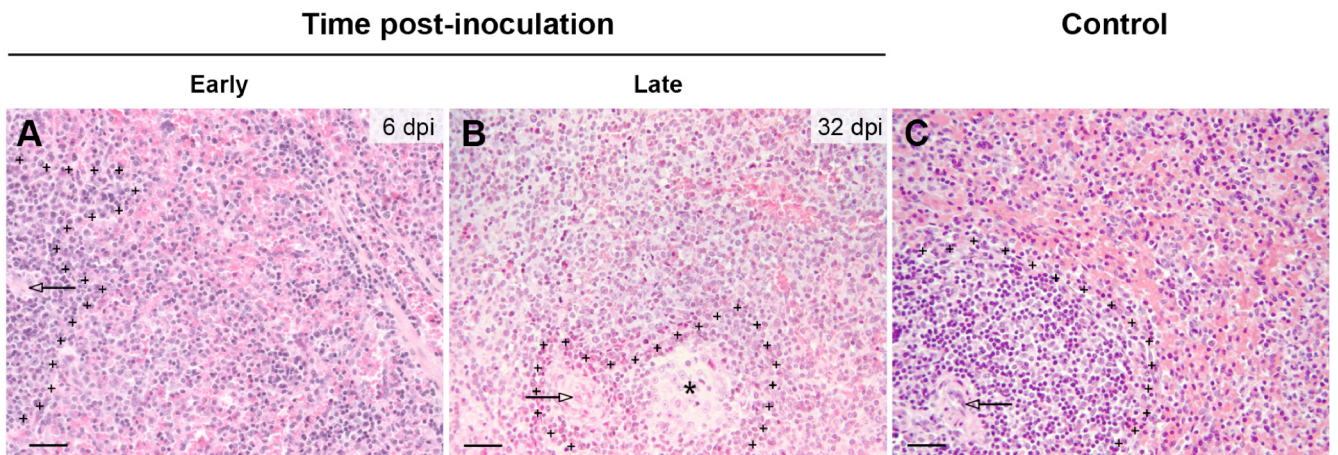

**Figure S2. Lesions observed in spleen from macaques inoculated with intermediate doses of CHIKV.**

(A) Spleen, 6 days post-inoculation (dpi). Density of mononuclear cells was diffusely increased in the red pulp, attenuating red pulp/white pulp boundary outline. A central artery of the white pulp (delineated with crosses) is indicated (arrow). (B) Spleen, 32 dpi. In the white pulp, the center of a lymphoid follicle (\*) is occupied by voluminous macrophages. A central artery of the white pulp (delineated with crosses) is indicated (arrow). (C) Normal spleen, with central artery of the white pulp (delineated with crosses) indicated (arrow).

Figure S3.

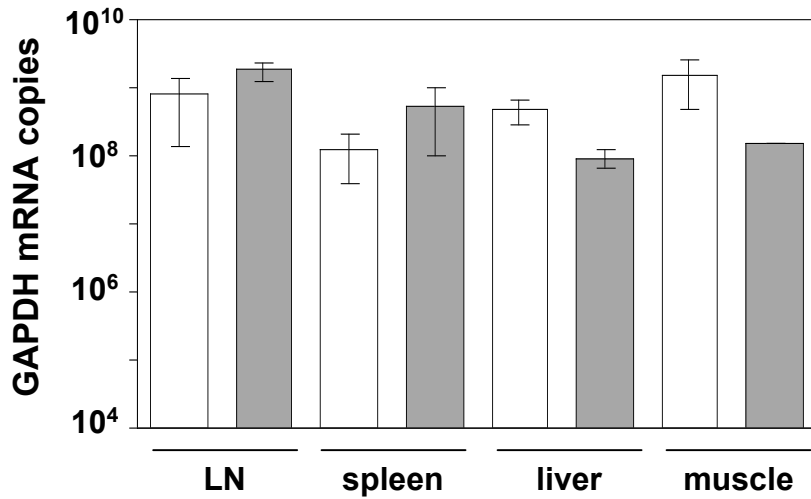

**Figure S3. GAPDH mRNA levels in healthy or CHIKV-infected tissues.**

Various tissues (lymph nodes (LN), spleen, liver or muscle) were collected from healthy (white bars) or CHIKV-infected macaques inoculated with 10<sup>9</sup> vRNA copies of CHIKV (gray bars). RNA was extracted from tissues and quantitative RT-PCR was performed using GAPDH primers and probe, as described in the material and methods section. Results are expressed as GAPDH mRNA copies in arbitrary units and SEM are indicated by vertical scale bars.

Figure S4.

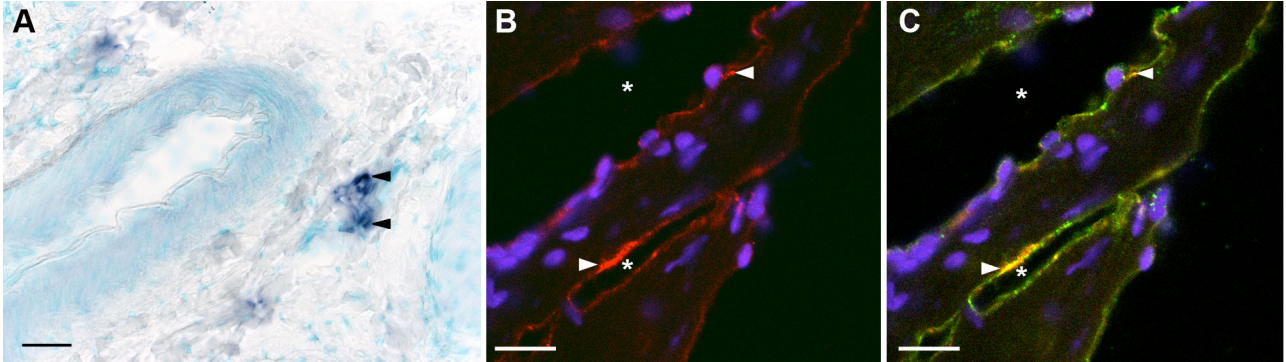

**Figure S4. Endothelial cells are CHIKV-infected at day 6 pi.**

(A) *In situ* hybridization assay in spleen. CHIKV positive RNA was detected in some endothelial cells (arrowhead) surrounding the vascular lumen, in the splenic connective tissue trabecula. Bar = 100  $\mu$ m.

(B-C) Spinal meninges. CHIKV antigen labelling is shown in red with nuclei stained in blue. CHIKV antigen was present in some endothelial cells (arrowhead) lining blood capillaries, for which lumens are indicated (\*). (C) In the right panel corresponding to the merged picture, some endothelial cells for which Factor VIII+ specific marker is labelled in green were also positive for CHIKV antigen. Bar = 20  $\mu$ m.

Figure S5.

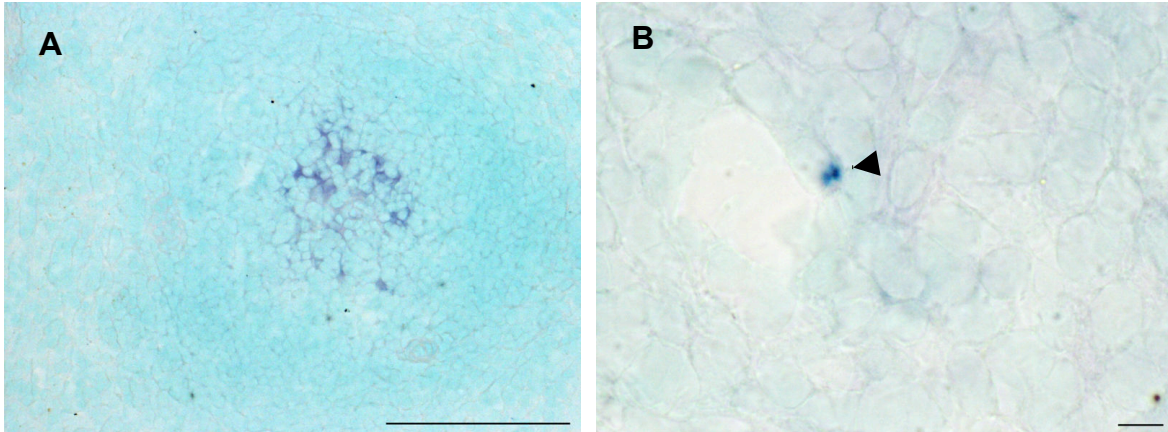

**Figure S5. CHIKV positive RNA was detected in spleen at day 19 and 55 pi.**

**(A)** Day 19 in situ hybridization assay in spleen. CHIKV positive RNA was detected in cells (arrow) surrounding follicular center in the white pulp at day 19 pi Bar = 100  $\mu\text{m}$ . **(B)** At day 55 isolated mononuclear cells labelled with probe specific for **CHIKV 26S RNA** were detected in white pulp (arrowhead). Bar =10  $\mu\text{m}$ .

Control assay were performed using probe specific for Ross River Virus 26S RNA and controls using CHIKV 26S RNA on tissues of an uninfected macaque were shown in figure 5

**Table S1.** Leukopenia and granulocytosis.

| Cell type<br>(Cell/ $\mu$ l) | Infected animals<br>(n=3 Fatal) |            |             | p*<br>Rec./<br>Fatal | Infected animals<br>(n=6 recovered) |            | Exposed uninfected<br>animals (n=3) |      | p*<br>Infect/<br>uninfect |          |
|------------------------------|---------------------------------|------------|-------------|----------------------|-------------------------------------|------------|-------------------------------------|------|---------------------------|----------|
|                              | Mean                            | $\pm$ SD   | range       |                      | Mean                                | $\pm$ SD   | range                               | Mean |                           | $\pm$ SD |
| Lymphocytes                  | 481                             | $\pm$ 89   | 382- 553    | 0.30                 | 768                                 | $\pm$ 338  | 280- 1190                           | 3914 | $\pm$ 632                 | 0.012    |
| Monocytes                    | 100                             | $\pm$ 36   | 67- 138     | 0.43                 | 172                                 | $\pm$ 95   | 56- 304                             | 645  | $\pm$ 34                  | 0.012    |
| Granulocytes                 | 10093                           | $\pm$ 1668 | 8499- 11827 | 0.43                 | 12899                               | $\pm$ 5857 | 5440- 21825                         | 4227 | $\pm$ 1212                | 0.028    |

(\*) p, Mann and Whitney test

**Table S1.**

Statistical comparison of the leukopenia and granulocytosis in fatal cases versus infected and recovered cases then between infected and exposed but uninfected animals. Significance was calculated using the Mann Whitney test.

**Table S2.** Organs and tissues sampled

| <b>System</b>            | <b>Organs and tissues</b>                                                                                                                                                                              |
|--------------------------|--------------------------------------------------------------------------------------------------------------------------------------------------------------------------------------------------------|
| Nervous system           | brain<br>spinal cord<br>sciatic nerve<br>eye<br>meninges                                                                                                                                               |
| Lymphoid tissues         | peripheral (retropharyngeal, <b>axillary</b> , popliteal and <b>superficial inguinal</b> ) and central (tracheobronchic, lomboortic and mediastinal) lymph nodes<br>thymus<br><b>spleen</b><br>tonsils |
| Endocrine system         | thyroid gland<br>adrenal gland                                                                                                                                                                         |
| Alimentary system        | salivary gland<br><b>tongue</b><br>esophagus<br>stomach<br><b>duodenum</b><br>jejunum<br>ileon<br>caecum<br>colon<br><b>liver</b><br>pancreas<br>gallbladder                                           |
| Respiratory system       | trachea<br><b>lung</b>                                                                                                                                                                                 |
| Cardiovascular system    | heart<br>aorta                                                                                                                                                                                         |
| Urinary system           | kidney<br>bladder                                                                                                                                                                                      |
| Reproductive system      | testis                                                                                                                                                                                                 |
| Integuments              | <b>skin</b><br>eyelid                                                                                                                                                                                  |
| Musculo-skeletal tissues | muscles ( <b>biceps brachii</b> , <b>sartorius</b> , psoas)<br>meniscus<br><b>articular cartilage</b><br>bone<br>articular capsule                                                                     |

**Table S2.** Organs and tissues sampled for histopathology and viral titre studies. Tissues from 9 infected macaques were analysed. Some tissues (bold) from an additional 7 infected animals were also analysed. Tissues from uninfected animals were used as control.

**Table S3.** Correlations; CCL2, IL-6, CD14%, and viral load

| <b>Comparison</b>                    | <b>Correlation</b> | <b>p-Value (Fisher exact)</b> |
|--------------------------------------|--------------------|-------------------------------|
| CCL2 (d1), Viral input (log)         | 0.831              | 0.0390                        |
| CCL2 (d1), %CD14+ cells (d1)         | -0.861             | 0.0248                        |
| IL-6 (peak), Viral input (log)       | 0.847              | 0.03                          |
| Viral input (log), %CD14+ cells (d1) | -0.935             | 0.0033                        |

**Table S3.** Correlation of CCL2 (MCP-1), viral input and percentage of blood monocytes expressing CD14 cell on day 1. Significance was determined using Fisher exact test.



**Table S4:** vRNA titers at T=0 and 3 days after C6/36 amplification. qRT-PCR was performed on tissue from CHIKV-infected macaques at 6 and 44 days pi.

| (vRNA copies /ml) |                         | Tissue homogenates day 0 | Tissue homogenates at day 3 on C6/36 cells * |                             |                 |                 |
|-------------------|-------------------------|--------------------------|----------------------------------------------|-----------------------------|-----------------|-----------------|
|                   |                         |                          | 1/10                                         | 1/100                       | 1/1000          | 1/10000         |
| <b>Day 6</b>      | <b>Liver</b>            | undetectable             | <b>7,89E+09</b>                              | <b>8,52E+09</b>             | <b>3,26E+09</b> | <b>1,84E+09</b> |
|                   | <b>Biceps</b>           | undetectable             | <b>3,84E+09</b>                              | <b>2,17E+09</b>             | neg             | neg             |
|                   | <b>Joint Capsule</b>    | <b>7,13E+07</b>          | <b>5,80E+09</b>                              | <b>2,50E+09</b>             | <b>1,12E+09</b> | <b>9,23E+08</b> |
| <b>Day 44</b>     | <b>Spleen</b>           | undetectable             | <b>6,45E+03**</b>                            | <b>5,92E+03<sup>§</sup></b> | neg             | neg             |
|                   | <b>Liver</b>            | undetectable             | <b>1,00E+03</b>                              | neg                         | neg             | neg             |
|                   | <b>Sartorius muscle</b> | undetectable             | <b>5,46E+04<sup>§</sup></b>                  | neg                         | neg             | neg             |
|                   | <b>Meniscus</b>         | undetectable             | neg                                          | neg                         | neg             | neg             |

\*: values are mean of quadruplicate; neg qRT-PCR samples were also negative after subsequent BHK21 amplification

\*\* : 2 out of 4 wells were positive. All the wells were positive after subsequent amplification on BHK21.

§: only a single well out the 4 replicates was positive and only this one was successfully amplified following the subsequent BHK21 amplification.

The supernatants of tissue homogenates and the supernatants of C6/36 cells inoculated with serial dilutions of these lysates were monitored at day 0 and day 3 for vRNA using specific CHIKV qRT-PCR assay as described in material and method. In samples from day 3, no RNA extraction was performed as described by Pastorino et al. Briefly, after dilution to 1/10 of the samples in RNase free water, 3 µl was subjected to the qRT-PCR assay; the cut-off values were in this method close to  $5 \times 10^4$  vRNA copies/mL. In samples from day 44, RNA extraction was performed to decrease the cut-off down to  $10^3$  vRNA copies/mL.

Pastorino, B., Bessaud, M., Grandadam, M., Murri, S., Tolou, H.J., and Peyrefitte, C.N. 2005. Development of a TaqMan RT-PCR assay without RNA extraction step for the detection and quantification of African Chikungunya viruses. *J Virol Methods* 124:65-71.
